# Supplementary material for: Implication of Galectin-3 for Neuroinflammation in the Visual Pathway of the Experimental Optic Neuritis
Source: Preprints.org preprint supplement (doi:10.20944/preprints202311.0095.v1), 2023-11-01
Supplement: Supplementary file 1 [file supplementary]

**
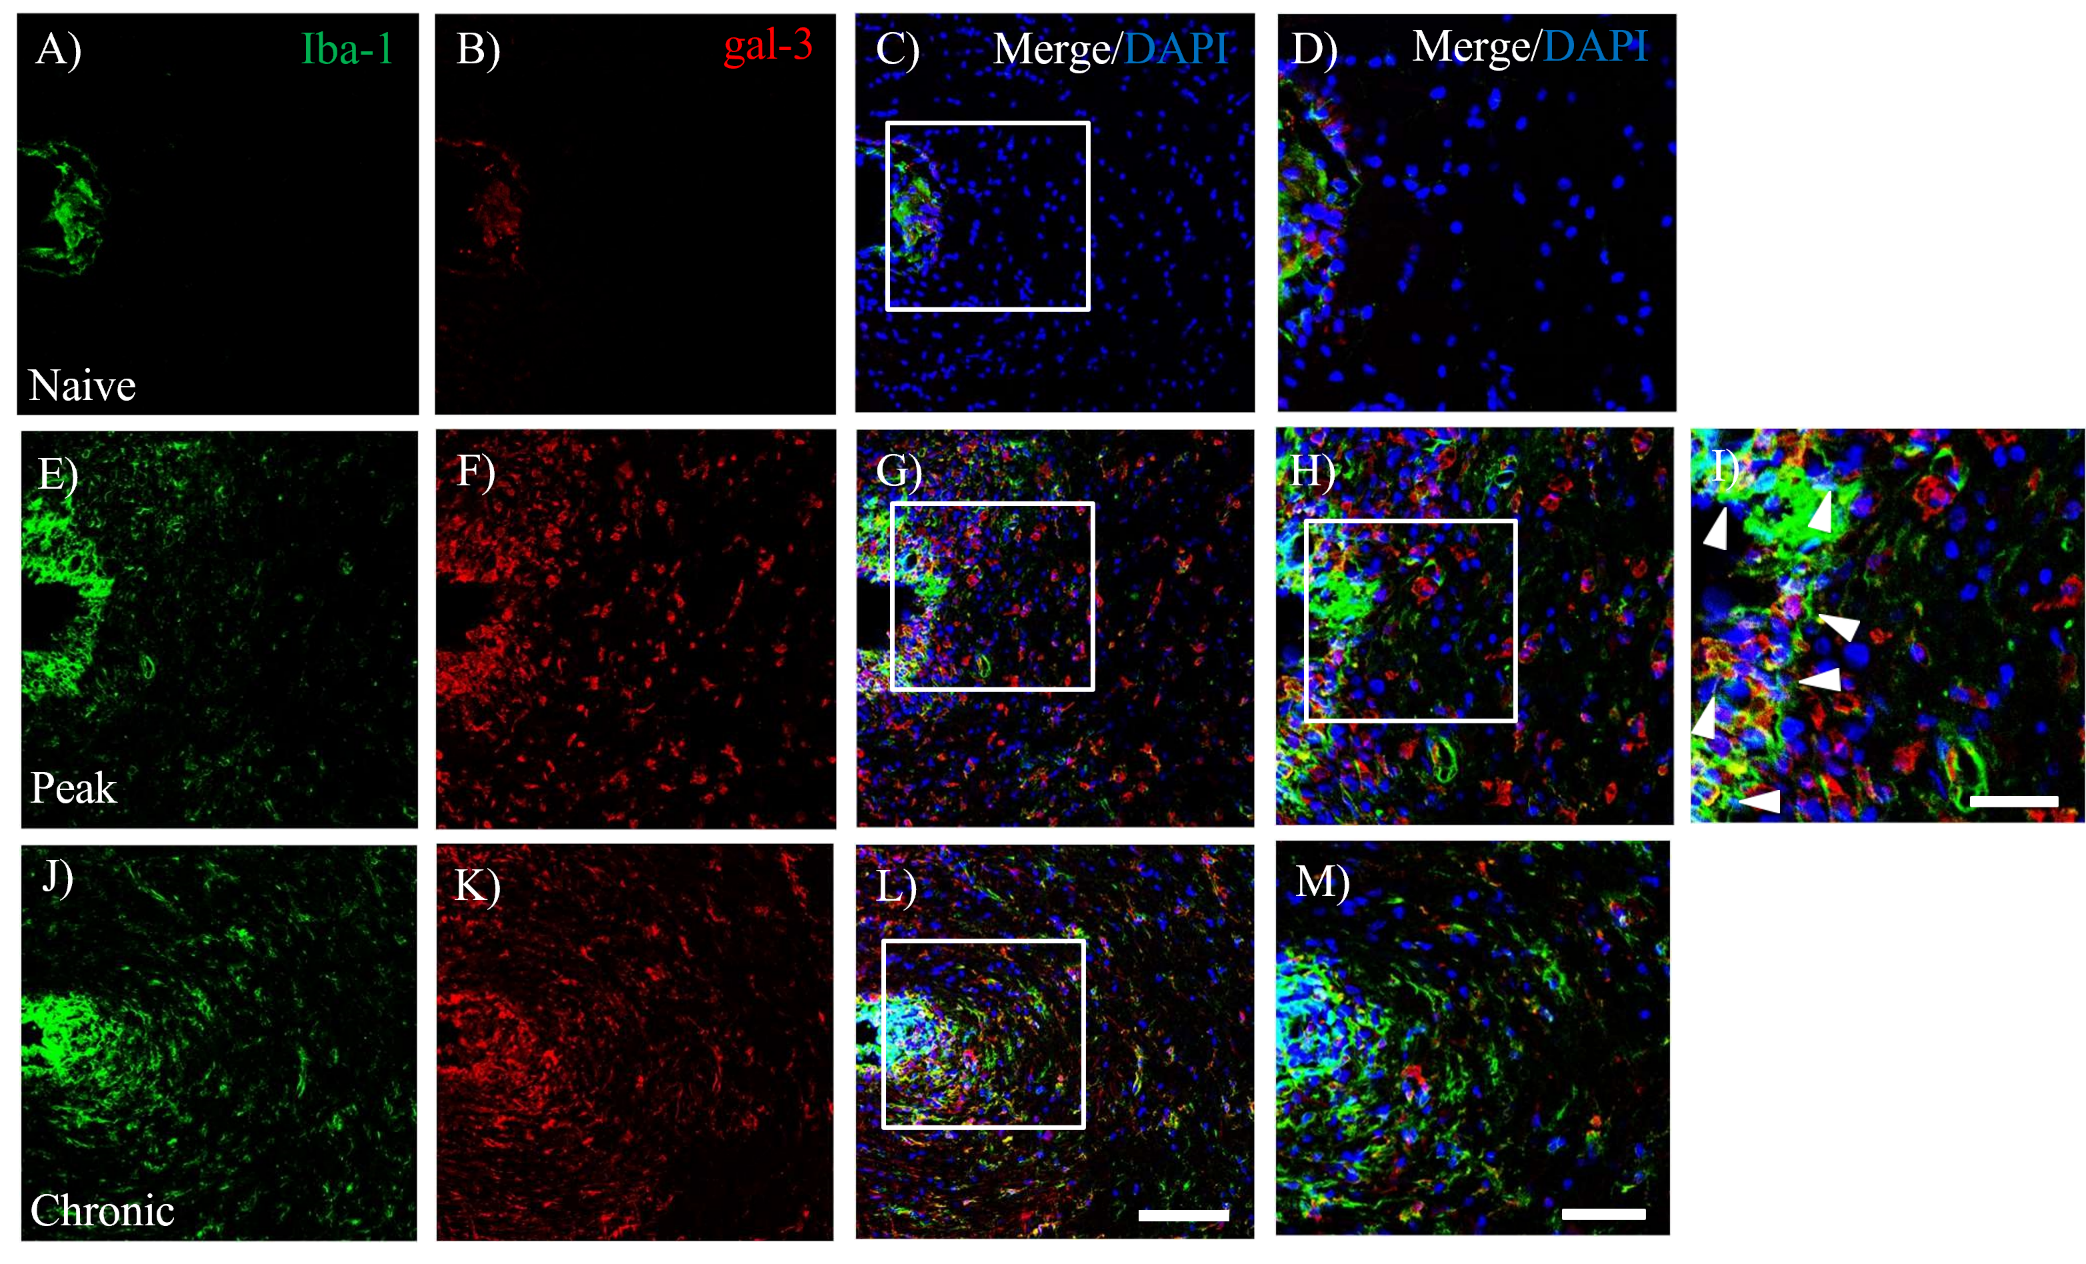
**

**
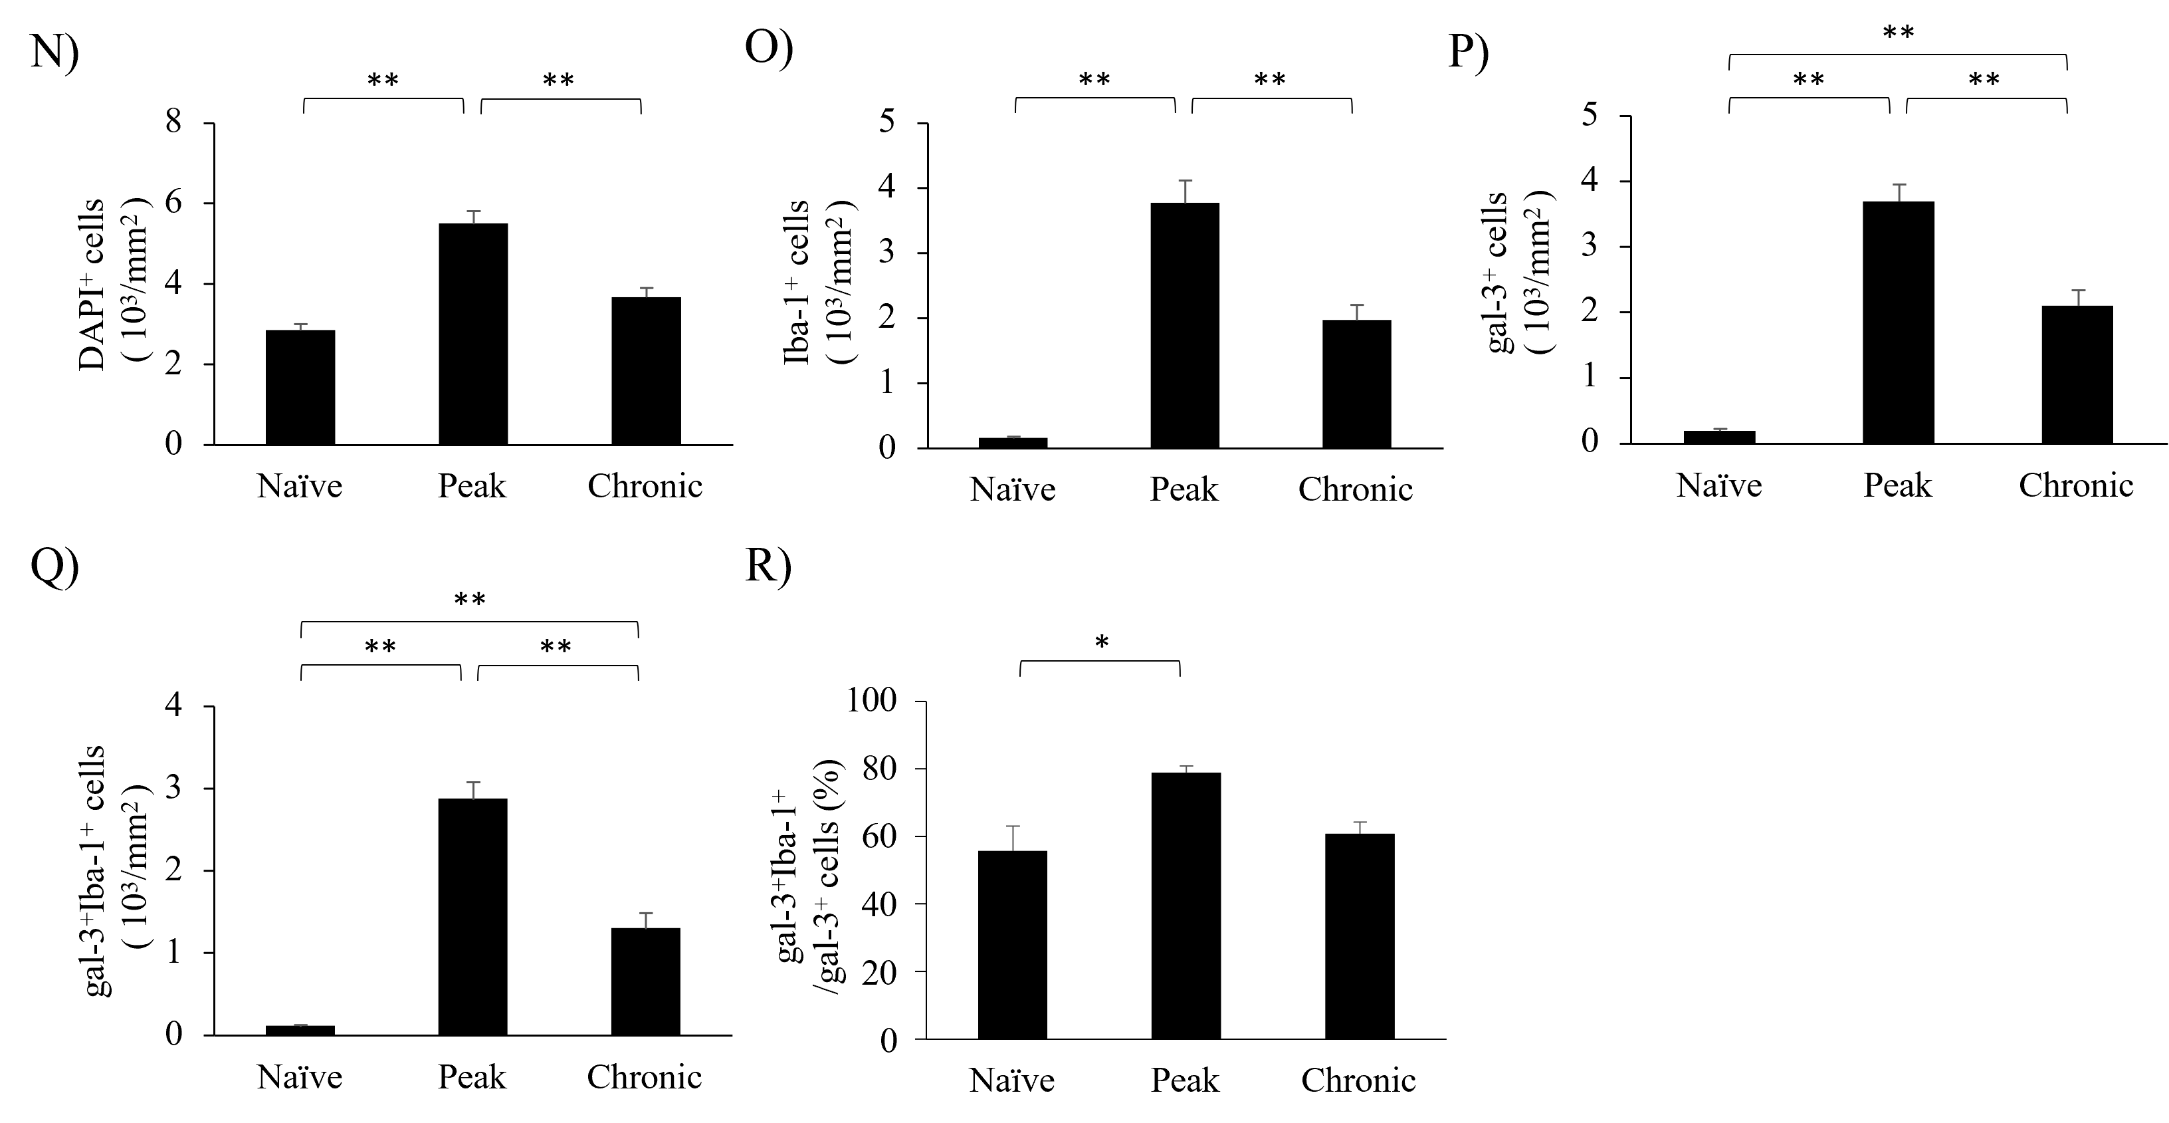
**

**Figure S1. Expression of gal-3 in EAE optic chiasm.** Naïve (A-D) and EAE mice were perfused at either the peak disease (E-I) or the chronic phase (J-M) after MOG immunization and optic nerve to optic tract with brain was taken out. Frozen sections were stained with anti-Iba-1 antibody (A, E, J, green) and anti-gal-3 antibody (B, F, K, red). DAPI staining (blue) was also performed. Merged images are also shown (C, D, G, H, I, L, M). Images with high-power magnification of each panel (C, G, L, inset) are shown, respectively (D, H, M). A High-power magnification of panel H (inset) is also shown in panel I. (N-R) Quantitative analysis were shown. The numbers of DAPI+ cells (N), Iba-1+ cells (O), gal-3+ cells (P), gal-3+Iba-1+ cells (Q), and gal-3+Iba-1+ cells/gal-3+ cells (R) in optic chiasm of naïve and EAE mice were shown. Six mice per group were examined. Scale bars: C, G, L: 100 μm, D, H, M: 50 μm, I: 25 μm. *p<0.05, **p<0.01 are shown.

**
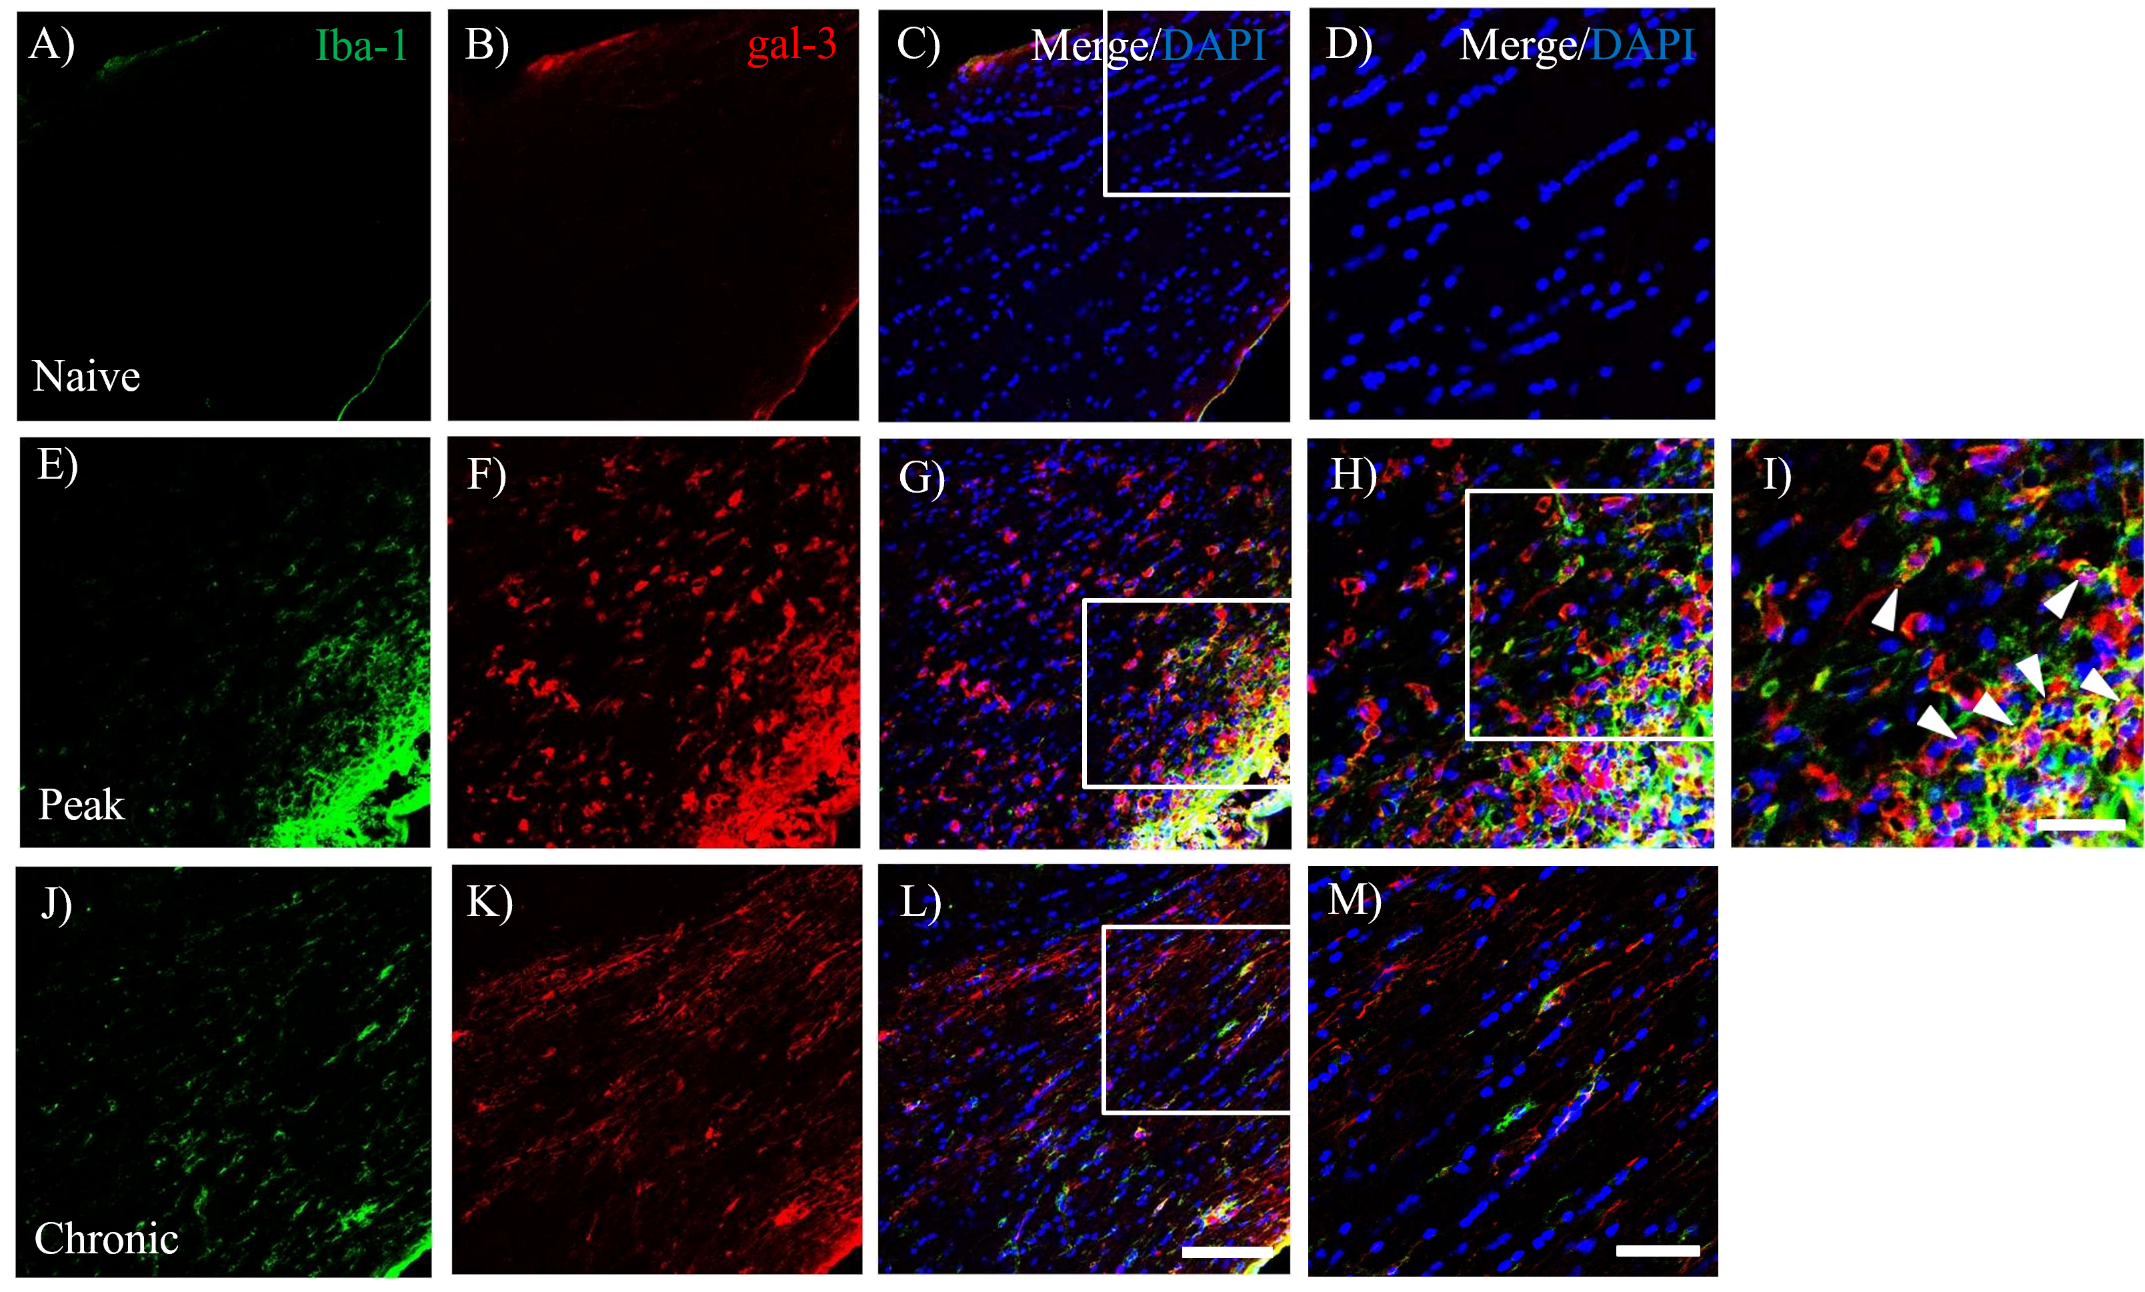
**

**
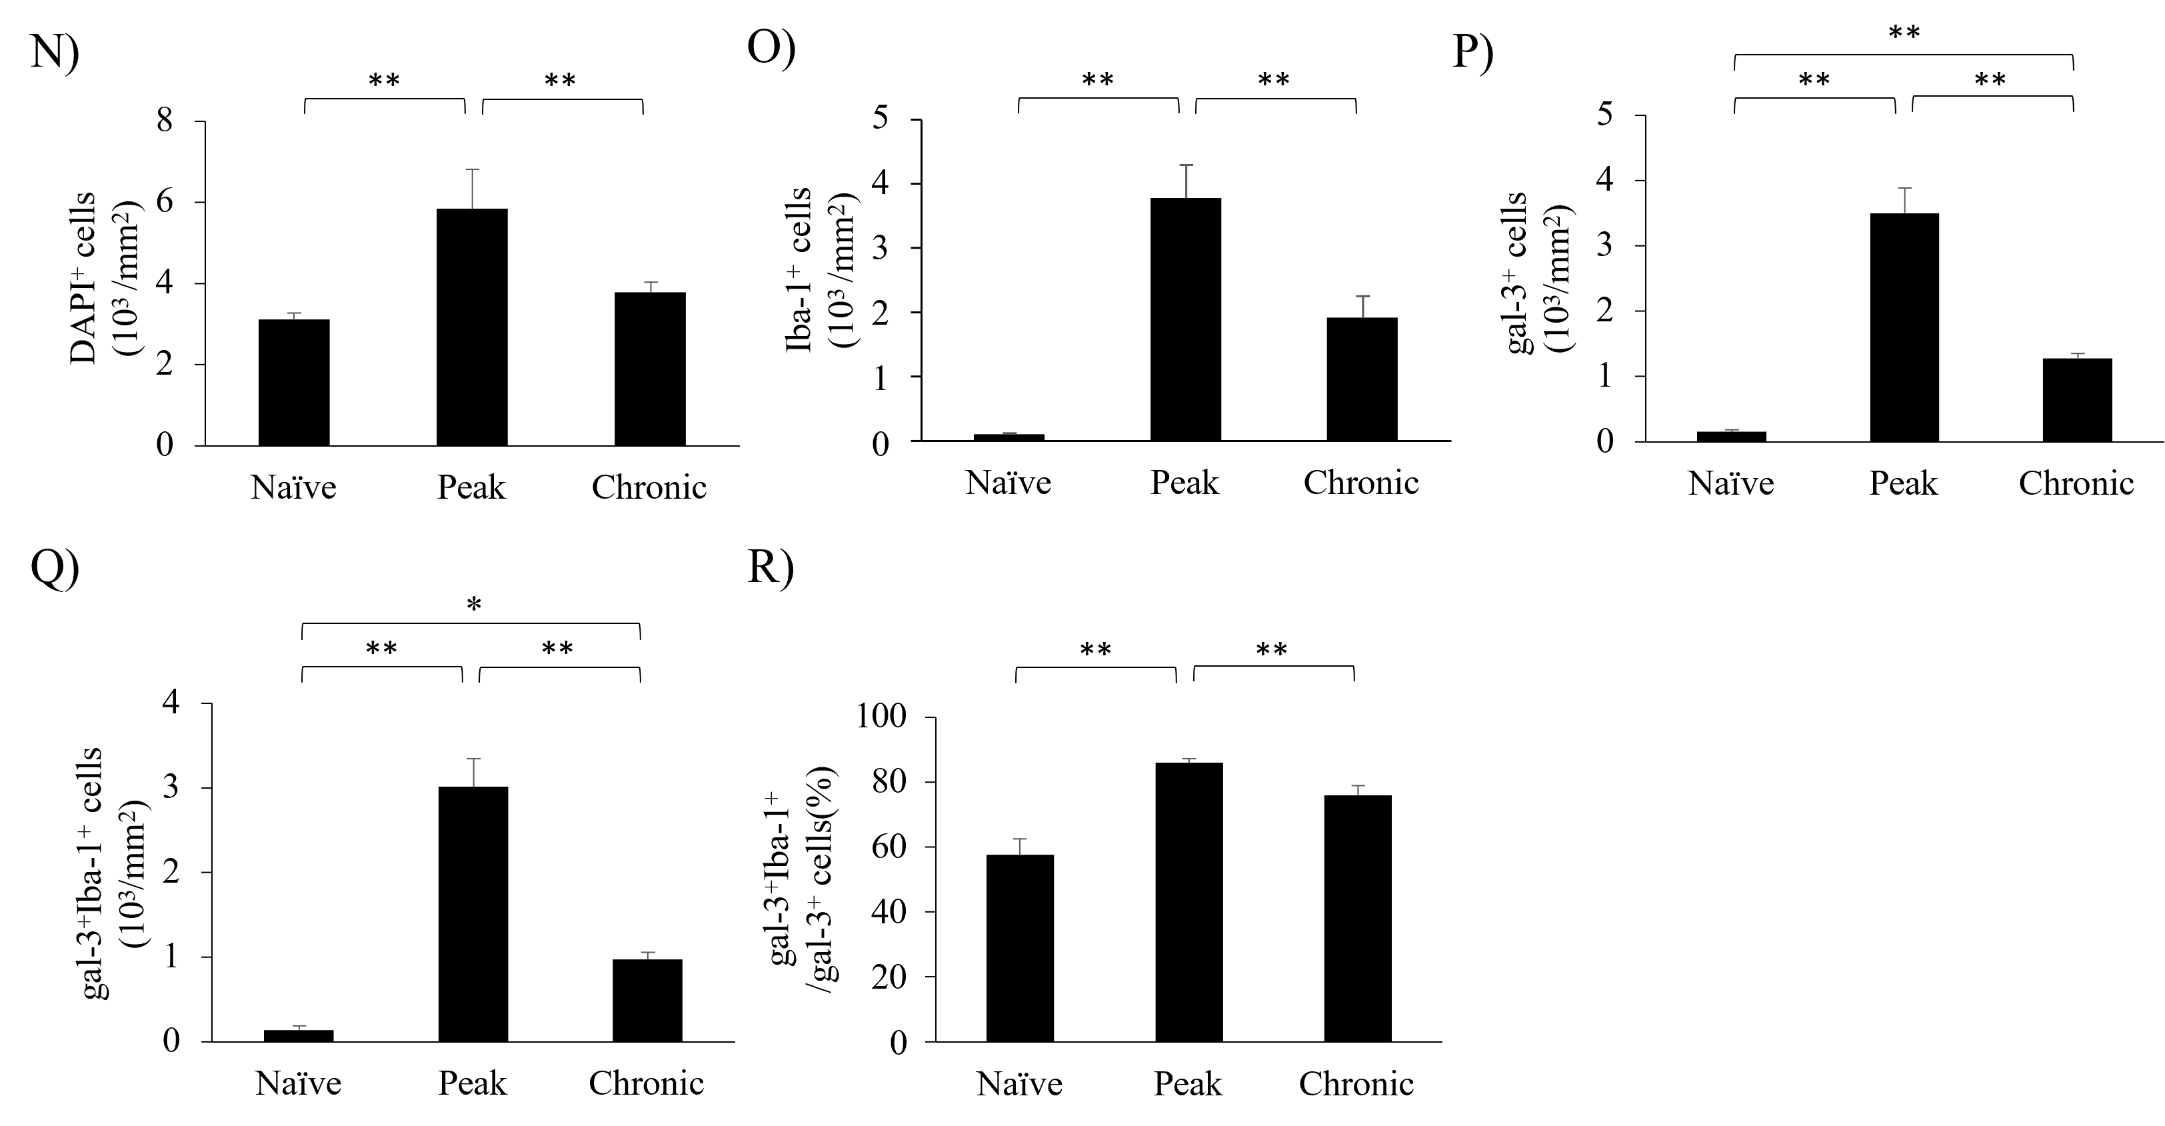
**

**Figure.S2 Expression of gal-3 in EAE optic tract.** Naïve (A-D) and EAE mice were perfused at either the peak disease (E-I) or the chronic phase (J-M) after MOG immunization and optic nerve to optic tract with brain was taken out. Frozen sections were stained with anti-Iba-1 antibody (A, E, J, green) and anti-gal-3 antibody (B, F, K, red). DAPI staining (blue) was also performed. Merged images are also shown (C, D, G, H, I, L, M). Images with high-power magnification of each panel (C, G, L, inset) are shown, respectively (D, H, M). A High-power magnification of panel H (inset) is also shown in panel I. (N-R) Quantitative analysis were shown. The numbers of DAPI+ cells (N), Iba-1+ cells (O), gal-3+ cells (P), gal-3+Iba-1+ cells (Q), and gal-3+Iba-1+ cells/gal-3+ cells (R) in optic tract of naïve and EAE mice were shown. Six mice per group were examined. Scale bars: C, G, L: 100 μm, D, H, M: 50 μm, I: 25 μm. *p<0.05, **p<0.01 are shown.

**
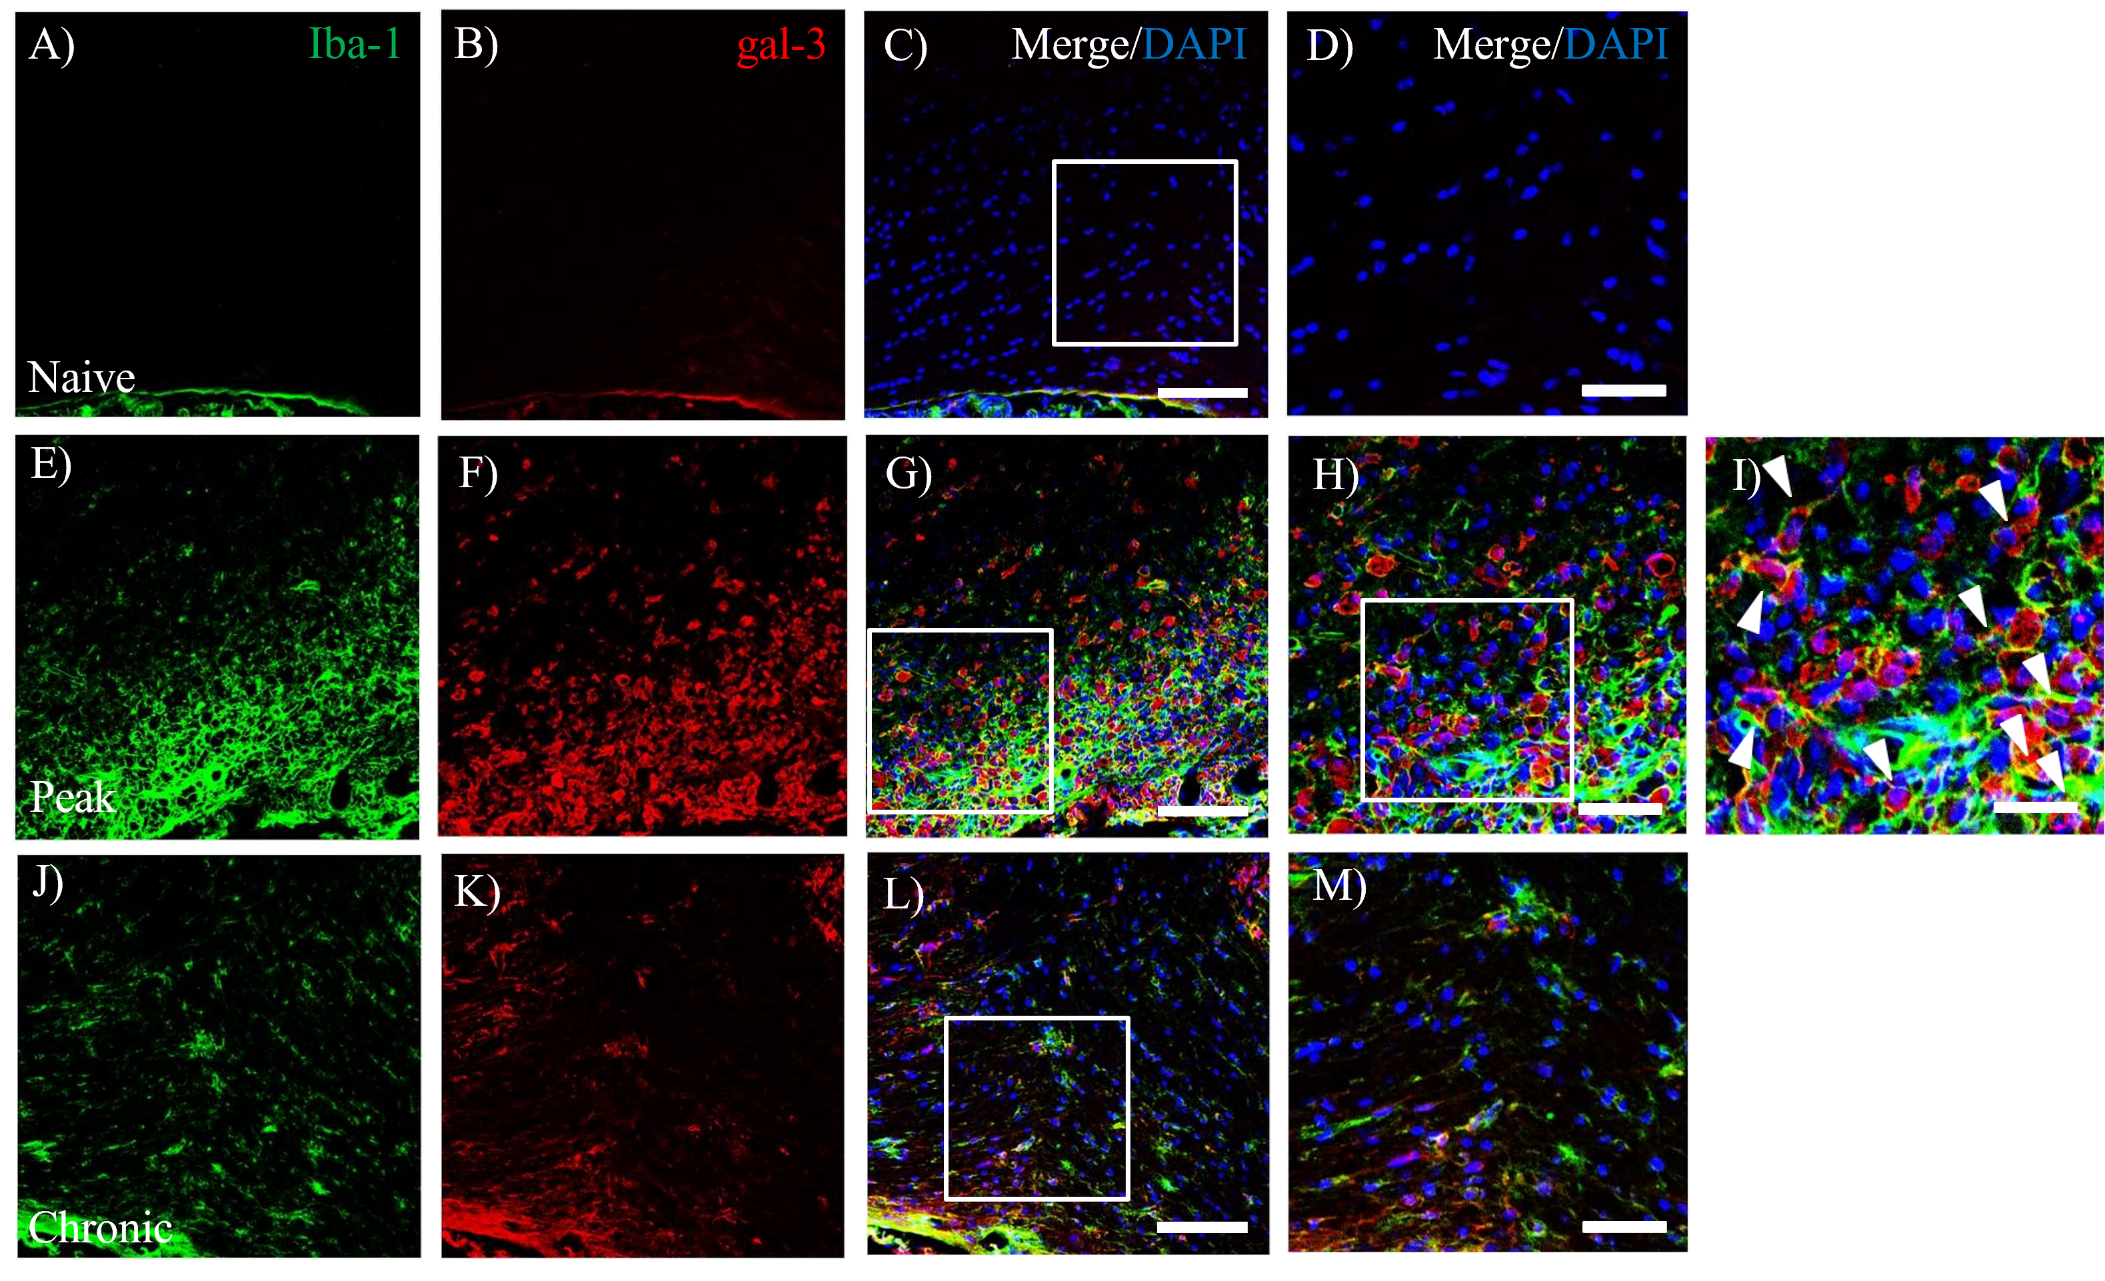
**

**
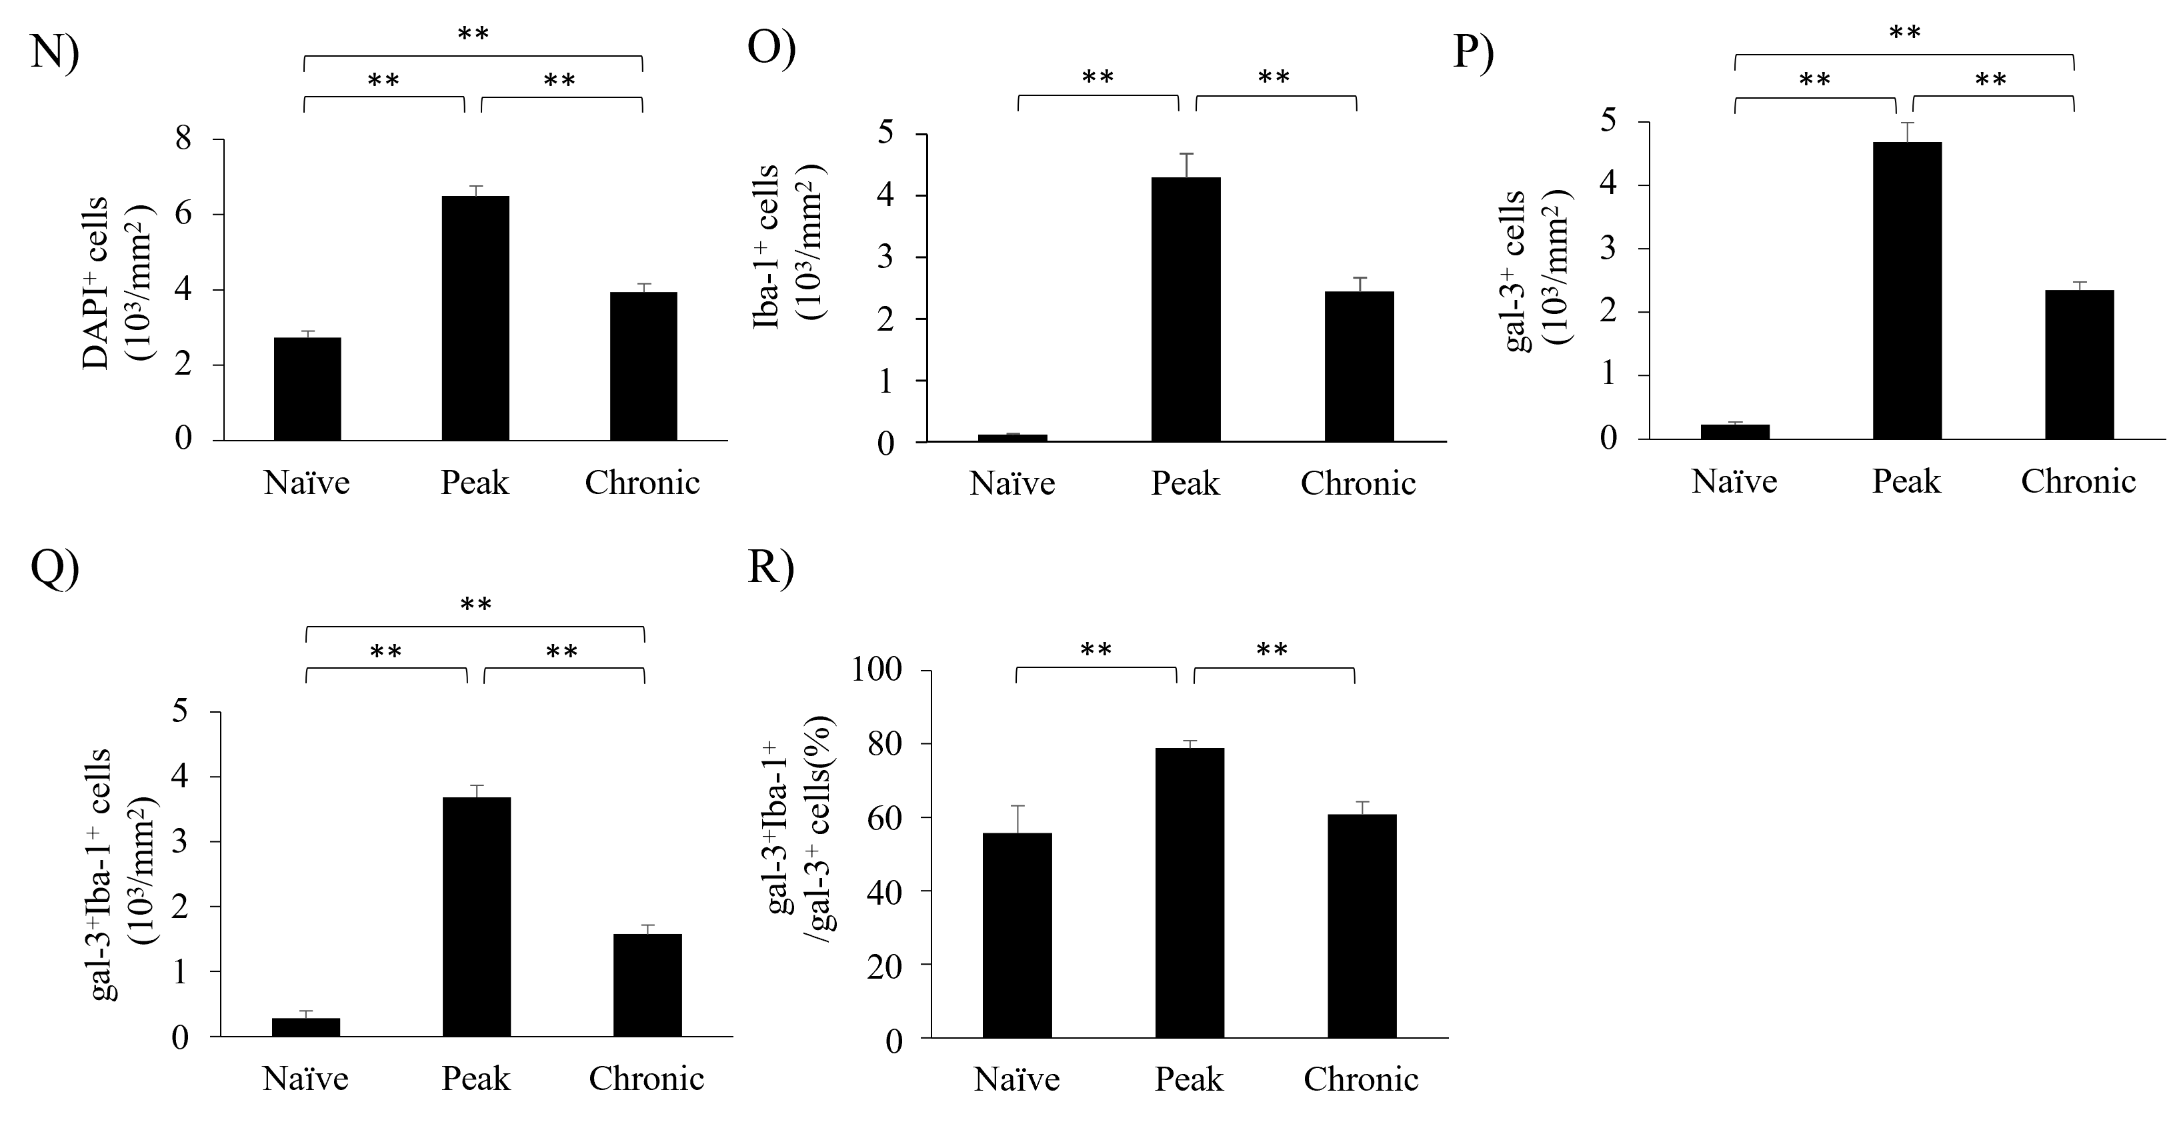
**

**Figure. S3**
